# Supplementary material for: Evaluation of the Ability of PAMPA Membranes to Emulate Biological Processes through the Abraham Solvation Parameter Model
Source: MDPI journal article supplement (doi:10.3390/membranes13070640), 2023-06-30
Supplement: s1 [file membranes-2478824-supplementary.pdf › membranes-2478824-supplementary.pdf]

**Prediction of skin permeation through parallel artificial membrane permeability assays (PAMPA). Evaluation through the Abraham solvation parameter model.**

Sara Soriano-Meseguer<sup>1</sup>, Elisabet Fuguet<sup>1,2,3,\*</sup>, Adriana Port<sup>4</sup>, Martí Rosés<sup>1,2</sup>

<sup>1</sup> Departament d'Enginyeria Química i Química Analítica, Universitat de Barcelona (UB), Martí i Franquès 1-11, 08028 Barcelona, Spain. [sara.sorioanomeseguer@gmail.com](mailto:sara.sorioanomeseguer@gmail.com); [elifuguetj@ub.edu](mailto:elifuguetj@ub.edu); [marti.roses@ub.edu](mailto:marti.roses@ub.edu)

<sup>2</sup> Institut de Biomedicina de la Universitat de Barcelona (IBUB), Universitat de Barcelona (UB), av. Diagonal, 643, 08028 Barcelona, Spain.

<sup>3</sup> Serra Húnter Programme, Generalitat de Catalunya, 08002 Barcelona, Spain.

<sup>4</sup> Welab Barcelona, Parc Científic de Barcelona, Baldiri Reixac, 4-8, 08028 Barcelona, Spain. [aport@welab.barcelona](mailto:aport@welab.barcelona)

## **Supplementary Information**

**Table S1.** Permeability and descriptor values for the compounds tested in the certramide PAMPA system (PAMPA-Certramide).

|                                                 | $\log P_0$ | $E$   | $S$  | $A$  | $B$  | $V$    |
|-------------------------------------------------|------------|-------|------|------|------|--------|
| 2,4-dichlorophenol                              | -3.92      | 0.960 | 0.82 | 0.54 | 0.17 | 1.0199 |
| 2-hydroxybenzoic acid                           | -4.42      | 0.900 | 0.85 | 0.73 | 0.37 | 0.9904 |
| 2-isopropyl-5-methylphenol (thymol)             | -4.01      | 0.822 | 0.80 | 0.43 | 0.44 | 1.3387 |
| 2-nitro- <i>p</i> -phenylenediamine             | -5.24      | 1.525 | 2.05 | 0.35 | 0.70 | 1.0902 |
| 3-methylphenol ( <i>m</i> -cresol)              | -4.33      | 0.822 | 0.88 | 0.57 | 0.34 | 0.9160 |
| 4-amino-2-nitrophenol                           | -4.59      | 1.360 | 1.50 | 0.30 | 0.66 | 1.0491 |
| 4-chlorophenol                                  | -4.27      | 0.915 | 1.08 | 0.67 | 0.20 | 0.8975 |
| 4-ethylphenol                                   | -4.19      | 0.800 | 0.90 | 0.55 | 0.36 | 1.0569 |
| 4-hydroxybenzyl alcohol                         | -5.85      | 0.998 | 1.30 | 0.86 | 0.79 | 0.9747 |
| 4-hydroxymethyl phenylacetate                   | -5.07      | 0.908 | 1.46 | 0.59 | 0.68 | 1.2722 |
| 4-hydroxyphenyl acetamide                       | -6.07      | 1.180 | 2.08 | 0.84 | 0.94 | 1.1724 |
| 4-nitrophenol                                   | -4.91      | 1.070 | 1.72 | 0.82 | 0.26 | 0.9493 |
| 5,5-diethylbarbituric acid (barbital)           | -5.75      | 1.030 | 1.00 | 0.58 | 1.12 | 1.3739 |
| 5-ethyl-5-phenylbarbituric acid (phenobarbital) | -6.05      | 1.630 | 1.72 | 0.71 | 1.18 | 1.6999 |
| 5-fluorouracil                                  | -5.77      | 0.720 | 0.84 | 0.57 | 1.02 | 0.7693 |
| 8-methoxypsoralen                               | -4.30      | 1.611 | 1.70 | 0.00 | 0.80 | 1.4504 |
| aminopyrine                                     | -5.66      | 1.680 | 1.74 | 0.00 | 1.60 | 1.8662 |
| aniline                                         | -4.55      | 0.955 | 0.96 | 0.26 | 0.41 | 0.8162 |
| antipyrine                                      | -5.63      | 1.300 | 1.83 | 0.00 | 1.37 | 1.4846 |
| atrazine                                        | -4.67      | 1.220 | 1.29 | 0.17 | 1.01 | 1.6196 |
| benzoic acid                                    | -4.81      | 0.730 | 0.90 | 0.59 | 0.40 | 0.9317 |
| benzyl nicotinate                               | -4.15      | 1.262 | 1.38 | 0.00 | 0.85 | 1.6393 |
| caffeine                                        | -5.45      | 1.500 | 1.82 | 0.08 | 1.25 | 1.3632 |
| capsaicin                                       | -4.63      | 1.250 | 2.19 | 0.57 | 1.45 | 2.5971 |
| catechol                                        | -5.39      | 0.970 | 1.10 | 0.88 | 0.47 | 0.8338 |
| corteloxone                                     | -5.45      | 1.910 | 3.45 | 0.36 | 1.60 | 2.7389 |
| corticosterone                                  | -5.59      | 1.860 | 3.43 | 0.40 | 1.63 | 2.7389 |
| cortisone                                       | -6.09      | 1.960 | 3.50 | 0.36 | 1.87 | 2.7546 |
| dexamethasone                                   | -6.25      | 2.040 | 3.51 | 0.71 | 1.92 | 2.9132 |
| diclofenac                                      | -3.76      | 1.810 | 1.85 | 0.55 | 0.77 | 2.0250 |
| digitoxin                                       | -6.38      | 3.460 | 5.63 | 1.33 | 4.35 | 5.6938 |
| estradiol                                       | -4.15      | 1.800 | 1.77 | 0.86 | 1.10 | 2.1988 |
| estriol                                         | -6.07      | 1.970 | 1.74 | 1.06 | 1.63 | 2.2575 |
| fluocinonide                                    | -5.38      | 1.950 | 2.48 | 0.31 | 2.51 | 3.4601 |
| flurbiprofen                                    | -3.65      | 1.440 | 1.45 | 0.62 | 0.76 | 1.8389 |
| griseofulvin                                    | -5.28      | 1.750 | 2.64 | 0.00 | 1.44 | 2.3947 |
| hydrocortisone                                  | -6.17      | 2.030 | 3.49 | 0.71 | 1.90 | 2.7976 |
| hydroquinone                                    | -5.87      | 1.063 | 1.27 | 1.06 | 0.57 | 0.8338 |
| hydroxiprogesterone                             | -4.70      | 1.640 | 3.35 | 0.25 | 1.31 | 2.6802 |
| ibuprofen                                       | -3.59      | 0.730 | 0.70 | 0.57 | 0.79 | 1.7771 |
| indomethacine                                   | -4.35      | 2.240 | 1.47 | 0.58 | 1.43 | 2.5299 |
| isoquinoline                                    | -4.19      | 1.211 | 1.00 | 0.00 | 0.54 | 1.0443 |
| ketoprofen                                      | -4.64      | 1.650 | 2.26 | 0.55 | 0.89 | 1.9779 |
| ketorolac                                       | -5.05      | 1.600 | 2.03 | 0.65 | 1.05 | 1.8712 |

|                          |       |       |      |      |      |        |
|--------------------------|-------|-------|------|------|------|--------|
| Methyl 4-hydroxybenzoate | -4.88 | 0.930 | 1.46 | 0.71 | 0.46 | 1.1313 |
| methyl phenyl ether      | -4.34 | 0.708 | 0.75 | 0.00 | 0.29 | 0.9160 |
| naproxen                 | -4.18 | 1.510 | 2.02 | 0.60 | 0.67 | 1.7821 |
| o-phenylenediamine       | -5.41 | 1.260 | 1.40 | 0.24 | 0.73 | 0.9160 |
| o-toluidine              | -4.13 | 0.966 | 0.92 | 0.23 | 0.45 | 0.9571 |
| prednisolone             | -6.42 | 2.210 | 3.10 | 0.71 | 1.92 | 2.7546 |
| progesterone             | -4.13 | 1.450 | 3.29 | 0.00 | 1.14 | 2.6215 |
| pyridine                 | -4.49 | 0.631 | 0.84 | 0.00 | 0.52 | 0.6753 |
| pyroxicam                | -4.69 | 2.560 | 2.90 | 0.17 | 1.49 | 2.2500 |
| testosterone             | -4.52 | 1.540 | 2.56 | 0.32 | 1.17 | 2.3827 |
| warfarin                 | -4.63 | 1.980 | 1.88 | 0.29 | 1.57 | 2.3077 |

---

**Table S2.** Permeability and descriptor values for the compounds tested in the 70% silicon – 30% IPM PAMPA system (PAMPA-IPM).

|                                  | $\log P_0$ | $E$   | $S$  | $A$  | $B$  | $V$    |
|----------------------------------|------------|-------|------|------|------|--------|
| 2-amino-4-nitrophenol            | -4.84      | 1.415 | 1.95 | 1.01 | 0.43 | 1.0491 |
| 2-naphthol                       | -4.19      | 1.52  | 1.08 | 0.61 | 0.4  | 1.1441 |
| 2-nitro- <i>p</i> -phenyldiamine | -4.94      | 1.525 | 2.05 | 0.35 | 0.7  | 1.0902 |
| 4-bromophenol                    | -3.9       | 1.08  | 1.17 | 0.67 | 0.2  | 0.9501 |
| 4-chlorophenol                   | -4.1       | 0.915 | 1.08 | 0.67 | 0.2  | 0.8975 |
| 4-ethylphenol                    | -4.05      | 0.8   | 0.9  | 0.55 | 0.36 | 1.0569 |
| 4-nitrophenol                    | -4.33      | 1.07  | 1.72 | 0.82 | 0.26 | 0.9493 |
| antipyrine                       | -6.2       | 1.32  | 1.5  | 0    | 1.48 | 1.4846 |
| atrazine                         | -4.21      | 1.51  | 1.17 | 0.32 | 0.96 | 1.6196 |
| benzyl nicotinate                | -4.26      | 1.262 | 1.6  | 0    | 0.8  | 1.6393 |
| caffeine                         | -5.63      | 1.5   | 1.72 | 0.05 | 1.28 | 1.3632 |
| corticosterone                   | -5.06      | 1.86  | 3.43 | 0.4  | 1.63 | 2.7389 |
| dexamethasone                    | -5.75      | 2.04  | 3.51 | 0.71 | 1.92 | 2.9131 |
| diclofenac                       | -4.33      | 2.275 | 1.22 | 0.63 | 0.96 | 2.025  |
| ephedrine                        | -4.82      | 0.916 | 0.76 | 0.21 | 1.21 | 1.4385 |
| hydrocortisone                   | -5.94      | 2.03  | 3.49 | 0.71 | 1.9  | 2.7976 |
| indomethacin                     | -4.2       | 2.236 | 1.35 | 0.57 | 1.57 | 2.5299 |
| isoquinoline                     | -4.05      | 1.211 | 1    | 0    | 0.47 | 1.0443 |
| ketoprofen                       | -4.25      | 1.65  | 2.26 | 0.55 | 0.89 | 1.9779 |
| lidocaine                        | -4.35      | 1.01  | 1.5  | 0.12 | 1.21 | 2.0589 |
| methyl nicotinate                | -4.32      | 0.71  | 1.13 | 0    | 0.71 | 1.0315 |
| naproxen                         | -4.11      | 1.51  | 1.98 | 0.6  | 0.68 | 1.7821 |
| nicotine                         | -4.58      | 0.865 | 0.92 | 0    | 1.08 | 1.371  |
| phenobarbital                    | -5.15      | 1.63  | 1.8  | 0.73 | 1.15 | 1.6999 |
| phenol                           | -4.14      | 0.805 | 0.89 | 0.6  | 0.3  | 0.7751 |
| piroxicam                        | -4.35      | 2.84  | 1.91 | 0.55 | 1.82 | 2.25   |
| progesterone                     | -4.56      | 1.45  | 3.29 | 0    | 1.14 | 2.6215 |
| resorcinol                       | -5.62      | 0.98  | 1.11 | 1.09 | 0.52 | 0.8338 |
| salicylic acid                   | -4.16      | 0.89  | 0.84 | 0.7  | 0.4  | 0.9904 |
| testosterone                     | -4.11      | 1.54  | 2.59 | 0.32 | 1.19 | 2.3827 |
| thymol                           | -4.34      | 0.822 | 0.79 | 0.52 | 0.44 | 1.3387 |
